# Supplementary material for: In silico design, synthesis and evaluation of 3′-O-benzylated analogs of salacinol, a potent α-glucosidase inhibitor isolated from an Ayurvedic traditional medicine “Salacia”
Source: Royal Society of Chemistry journal article supplement (doi:10.1039/c2cc34144a), 2012-01-01
Supplement: c2cc34144a.pdf [file c2cc34144a.pdf]

*In silico* design, synthesis and evaluation of 3'-*O*-benzylated analogs of salacinol, a potent  $\alpha$ -glucosidase inhibitor from Ayurvedic traditional medicine “*Salacia*”

Genzoh Tanabe,<sup>a</sup> Shinya Nakamura,<sup>a</sup> Nozomi Tsutsui,<sup>a</sup> Gorre Balakishan,<sup>a</sup> Weijia Xie,<sup>c</sup> Satoshi Tsuchiya,<sup>a</sup> Jyunji Akaki,<sup>b</sup> Toshio Morikawa,<sup>b</sup> Kiyofumi Ninomiya,<sup>b</sup> Isao Nakanishi,<sup>a</sup> Masayuki Yoshikawa,<sup>d</sup> and Osamu Muraoka<sup>\*a</sup>

<sup>a</sup> School of Pharmacy and <sup>b</sup>Pharmaceutical Research and Technology Institute, Kinki University, 3-4-1 Kowakae, Higashi-osaka, Osaka 577-8502, Japan

Fax: (+81)667212505

Tel: (+81)667212332.

<sup>c</sup> Department of Medicinal Chemistry, China Pharmaceutical University, 24 Tongjia Xiang, Nanjing, Jiangsu 210009, PR China.

<sup>d</sup> Kyoto Pharmaceutical University, 1 Shichono-cho, Misasagi, Yamashina-ku, Kyoto 607-8412, Japan.

## Electronic Supplementary Information (ESI)

| <b>Table of Contents</b>   | <b>Page#</b> |
|----------------------------|--------------|
| 1 Experimental Section     | S2           |
| 2 NMR Spectra              | S4           |
| 3 Enzyme Inhibition Assays | S6           |
| 4 Reference                | S6           |

## Experimental Section

IR spectra were measured on either a Shimadzu IR-435 grating spectrophotometer or a Shimadzu FTIR-8600PC spectrophotometer. NMR spectra were recorded on a JEOL JNM-ECA 500 (500 MHz  $^1\text{H}$ , 125 MHz  $^{13}\text{C}$ ) spectrometer. Low-resolution and high-resolution mass spectra were recorded on a JEOL JMS-HX 100 spectrometer. Optical rotations were determined with a JASCO P-2200 polarimeter. Column chromatography was effected over Fuji Silysia silica gel BW-200.

### 1,4-Dideoxy-1,4-[(*R*)-[4-deoxy-1-*O*-(*p*-methoxybenzyl)-2-*O*-(*o*-nitrobenzyl)-*D*-erythritol-4-yl]episulfoniumylidene]-2,3,5-tri-*O*-(*p*-methoxybenzyl)-*D*-arabinitol Tetrafluoroborate ( $\alpha$ -**13k** and $\beta$ -**13k**)

To a mixture of **8k** (100 mg, 0.28 mmol), **9** (118 mg, 0.23 mmol), and dichloromethane (2 ml) was added tetrafluoroboric acid ethyl ether complex [ $\text{HBF}_4 \cdot (\text{C}_2\text{H}_5)_2\text{O}$ , 41  $\mu\text{l}$ , 0.3 mmol] at  $-60\text{ }^\circ\text{C}$ , and the reaction mixture was stirred at  $-60\text{ }^\circ\text{C}$  for 1h. After the reaction was quenched by addition of sodium acetate at  $-60\text{ }^\circ\text{C}$ , the resulting suspension was filtered, and inorganic materials were washed with dichloromethane. The combined filtrate and washings were condensed under the reduced pressure to give a pale yellow oil (247 mg), which on column chromatography ( $\text{CHCl}_3 \rightarrow \text{CHCl}_3\text{-MeOH}$ , 100:1–50:1) gave  $\alpha$ -**13k** (110 mg, 50%), a *ca.* 3:1 mixture of  $\alpha$ -**13k** and the stereoisomer  $\beta$ -**13k** (56 mg, 25%) and a *ca.* 1:1.5 mixture of  $\alpha$ -**13k** and  $\beta$ -**13k** (10 mg, 5%).

$\alpha$ -**13k**:  $[\alpha]_{\text{D}}^{25} -13.8$  ( $c = 0.94$ ,  $\text{CHCl}_3$ ). IR (neat): 3503, 1612, 1585, 1516, 1465, 1346, 1303, 1250, 1177, 1072, 1033  $\text{cm}^{-1}$ .  $^1\text{H}$  NMR (500 MHz,  $\text{CDCl}_3$ )  $\delta$ : 3.61 (1H, dd,  $J = 10.9, 4.0$  Hz, H-4'a), 3.674 (1H, dd,  $J = 10.3, 9.2$  Hz, H-5a), 3.678 (1H, dd,  $J = 10.9, 4.0$  Hz, H-4'b), 3.72 (1H, dd,  $J = 13.8, 3.7$  Hz, H-1a), 3.73 (1H, dd,  $J = 10.3, 7.2$  Hz, H-5b), 3.70–3.74 (1H, m, H-3'), 3.76 (1H, dd,  $J = 13.0, 6.3$  Hz, H-1'a), 3.77/3.81 (each 3H, s,  $\text{OCH}_3$ ), 3.78 (6H, s,  $\text{OCH}_3$ ), 3.81 (1H, dd,  $J = 13.0, 3.0$  Hz, H-1'b), 3.94 (1H, dd,  $J = 13.8, 1.7$  Hz, H-1b), 4.11 (1H, br dd-like,  $J = 9.2, 7.2$  Hz, H-4), 4.16 (1H, br dd-like,  $J = ca. 2.0, 1.2$  Hz, H-3), 4.29–4.33 (1H, m, H-2'), 4.31/4.39 (each 1H, d,  $J = 11.5$  Hz, 8H, m,  $\text{OCH}_2\text{Ar}$ ), 4.34 (1H, ddd-like,  $J = ca. 3.7, 2.0, 1.7$  Hz, H-2), 4.37–4.49 (6H, m,  $\text{OCH}_2\text{Ar}$ ), 4.90/4.95 (each 1H,  $J = 12.9$  Hz,  $\text{OCH}_2\text{Ar}$ ), 6.80–6.88 (8H, m, arom.), 7.05–7.24 (8H, m, arom.), 7.43 (1H, ddd,  $J = 7.8, 7.5, 1.4$  Hz, arom.), 7.58 (1H, ddd,  $J = 8.3, 7.8, 1.2$  Hz, arom.), 7.63 (1H, dd,  $J = 7.5, 1.4$  Hz, arom.), 7.93 (1H, dd,  $J = 8.3, 1.2$  Hz, arom.).  $^{13}\text{C}$  NMR (125 MHz,  $\text{CDCl}_3$ )  $\delta$ : 48.1 (C-1), 50.4 (C-1'), 55.2/55.3 ( $\text{OCH}_3$ ), 66.2 (C-4), 66.4 (C-5), 68.1 (C-4'), 68.4 (C-2'), 69.5/71.5/71.7/73.1/73.2 ( $\text{OCH}_2\text{Ar}$ ), 80.3 (C-3'), 81.9 (C-3), 82.2 (C-2), 113.8/113.9/114.05/114.07/124.5/128.7/129.6/129.65/129.72/129.7/130.0/133.7 (d, arom.), 127.9/128.0/128.9/133.1/148.0/159.3/159.5/159.7 (s, arom.). FABMS (pos.)  $m/z$ : 870 [ $\text{M-BF}_4$ ] $^+$ .

NMR data for the minor stereoisomer  $\beta$ -**13k** extracted from the spectrum of a mixture of a *ca.* 1:1.5 mixture:  $^1\text{H}$  NMR (500 MHz,  $\text{CDCl}_3$ )  $\delta$ : 3.57–3.84 (8H, m, H-1a, H-1'a, H-1'b, H-3', H-4'a, H-4'b, H-5a and H-5b), 3.75/3.76/3.79/3.80 (each 3H, s,  $\text{OCH}_3$ ), 4.01 (1H, br d,  $J = 14.6$  Hz, H-1b), 4.08–4.12 (m, H-4), 4.14 (1H, br s-like, H-3), 4.21–4.53 (8H, m,  $\text{OCH}_2\text{Ar}$ ), 4.32–4.38 (2H, m, H-2 and H-2'), 4.92/4.94 (each 1H, d,  $J = 13.2$  Hz,  $\text{OCH}_2\text{Ar}$ ), 6.77–6.88 (8H, m, arom.), 7.06–7.24 (8H, m, arom.), 7.41 (1H, td-like,  $J = ca. 7.8, 1.2$  Hz, arom.), 7.55 (1H, td-like,  $J = 8.0, 1.2$  Hz, arom.), 7.64 (1H, br d-like,  $J = ca. 8.0$  Hz, arom.), 7.96 (1H, dd,  $J = 8.0, 1.2$  Hz, arom.).  $^{13}\text{C}$ -NMR (125 MHz,  $\text{CDCl}_3$ )  $\delta$ : 41.8 (C-1'), 44.3 (C-1), 55.2 ( $\text{OCH}_3$ ), 61.9 (C-4), 64.6 (C-5), 67.1 (C-2'), 68.1 (C-4'), 69.5/71.8/72.9/73.2 ( $\text{OCH}_2\text{Ar}$ ), 80.7 (C-3'), 82.4 (C-2), 83.8 (C-3), 113.8/113.9/114.0/114.1/127.9/128.2/129.3/129.5/129.7/129.8/130.0 (d, arom.), 127.8/128.3/130.2/137.2/138.2/159.2/159.3/159.7/159.76/159.81 (s, arom.).

### 1,4-Dideoxy-1,4-*-(R)*-[4-deoxy-2-*O*-(*o*-nitrobenzyl)-D-erythritol-4-yl]episulfoniumylidene}-D-arabinitol Chloride (**7k**)

Sulfonium tetrafluoroborate **α-13k** (88 mg, 0.092 mmol) was treated in a mixture of 80% aqueous TFA (2 ml) and chloroform (1 ml) at room temperature for 6 h. After the reaction mixture was condensed at reduced pressure, the residue was washed with chloroform to give a colorless oil (43.5 mg), which was then stirred with ion exchange resin IRA-400J (2 g) in methanol (2 ml) at room temperature for 4 h. The resins were filtered off, and washed with methanol. The combined filtrate and washings were condensed to give a colorless oil (39 mg), which on column chromatography (CHCl<sub>3</sub>→CHCl<sub>3</sub>-MeOH, 50:1 → 10:1) gave title sulfonium salt **7k** (31.3 mg, 80%) as a colorless oil.  $[\alpha]_{\text{D}}^{25} +2.1$  ( $c = 1.12$ , CH<sub>3</sub>OH). IR (neat): 3287, 1612, 1578, 1524, 1404, 1346, 1308, 1261, 1200, 1173, 1076, 1026 cm<sup>-1</sup>. <sup>1</sup>H NMR (500 MHz, CD<sub>3</sub>OD)  $\delta$ : 3.60 (1H, ddd-like,  $J = 5.8, 4.0, 4.0$  Hz, H-3'), 3.74 (1H, dd,  $J = 12.3, 4.0$  Hz, H-4'a), 3.75 (1H, dd,  $J = 12.9, 9.2$  Hz, H-1'a), 3.82 (1H, dd,  $J = 12.9, 3.0$  Hz, H-1a), 3.848 (1H, dd-like,  $J = 12.9, 1.7$  Hz, H-1b), 3.852 (1H, dd-like,  $J = 12.9, 3.2$  Hz, H-1'b), 3.87 (1H, dd,  $J = 12.3, 4.0$  Hz, H-4'b), 3.92 (1H, dd,  $J = 10.1, 8.4$  Hz, H-5a), 4.01 (1H, br dd-like,  $J = 8.4, 5.2$  Hz, H-4), 4.04 (1H, dd,  $J = 10.1, 5.2$  Hz, H-5b), 4.29 (1H, ddd,  $J = 9.2, 5.8, 3.2$  Hz, H-2'), 4.37 (1H, br d-like,  $J = ca. 1.5$  Hz, H-3), 4.61 (1H, ddd-like,  $J = ca. 3.0, 1.7, 1.5$  Hz, H-2), 5.01/5.08 (each 1H, d,  $J = 11.5$  Hz, OCH<sub>2</sub>Ar), 7.53 (1H, ddd,  $J = 8.3, 7.8, 1.2$  Hz, arom.), 7.69 (1H, td,  $J = 7.8, 1.2$  Hz, arom.), 7.81 (1H, dd,  $J = 7.8, 1.2$  Hz, arom.), 8.01 (1H, dd,  $J = 8.3, 1.2$  Hz, arom.). <sup>13</sup>C NMR (125 MHz, CD<sub>3</sub>OD)  $\delta$ : 51.6 (C-1'), 52.2 (C-1), 60.7 (C-4'), 61.0 (C-5), 68.7 (C-2'), 70.3 (OCH<sub>2</sub>Ar), 73.6 (C-4), 79.4 (C-2), 79.6 (C-3), 84.1 (C-3'), 125.6/129.8/131.1/134.6 (d, arom.), 135.0/149.4 (s, arom.). FABMS  $m/z$ : 390, [M-Cl]<sup>+</sup> (pos.), HRFABMS  $m/z$ : 390.1214 (C<sub>16</sub>H<sub>24</sub>O<sub>8</sub>NS requires 390.1223).





**Enzyme Inhibition Assays:** Rat small intestinal brush border membrane vesicles were prepared<sup>1</sup> and its suspension in 0.1 M maleate buffer (pH 6.0) was used as small intestinal  $\alpha$ -glucosidase of maltase, sucrase, and isomaltase. A test compound was dissolved in dimethylsulfoxide (DMSO), and the resulting solution was diluted with 0.1 M maleate buffer to prepare the test compound solution (concentration of DMSO: 10%). A substrate solution in maleate buffer (maltose, 74 mM, sucrose, 74 mM, isomaltose, 7.4 mM, 50  $\mu$ L), a test compound solution (25  $\mu$ L), and an enzyme solution (25  $\mu$ L) were mixed and incubated at 37 °C for 30 min. After incubation, the solution was immediately heated by boiling water for 2 min to stop the reaction, and was mixed with water (150  $\mu$ L). Glucose concentration was determined by the glucose-oxidase method. Final concentration of DMSO in the test solution was 2.5 % and no influence of DMSO was detected on the inhibitory activity.

## Reference

1. M. Kessler, O. Acuto, C. Storelli, H. Murer, M. Muller, and G. Semenza, *Biochim. Biophys. Acta*, 1978, **506**, 136.
